# Supplementary material for: New apocarotenoids and β-carotene cleavage in Blakeslea trispora
Source: Royal Society of Chemistry journal article supplement (doi:10.1039/c1ob05712j), 2011-01-01

## Supporting Information

# New apocarotenoids and $\beta$ -carotene cleavage in *Blakeslea trispora*.

Alejandro F. Barrero,<sup>\*a</sup> M. Mar Herrador,<sup>a</sup> Pilar Arteaga,<sup>a</sup> Jesús Gil,<sup>a</sup> Jose-Antonio González,<sup>a</sup>  
.Eugenio Alcalde,<sup>b</sup> Enrique Cerdá-Olmedo<sup>\*b</sup>

<sup>a</sup>Department of Organic Chemistry, Institute of Biotechnology, University of Granada, Avda. Fuente Nueva, s/n, 18071 Granada, Spain and <sup>b</sup>Department of Genetic, Faculty of Biology, University of Sevilla, Reina Mercedes, s/n, 41071 Sevilla, Spain

[afbarre@ugr.es](mailto:afbarre@ugr.es); [eco@us.es](mailto:eco@us.es).

| Table of contents | Page |
|-------------------|------|
| Spectra           | S2   |

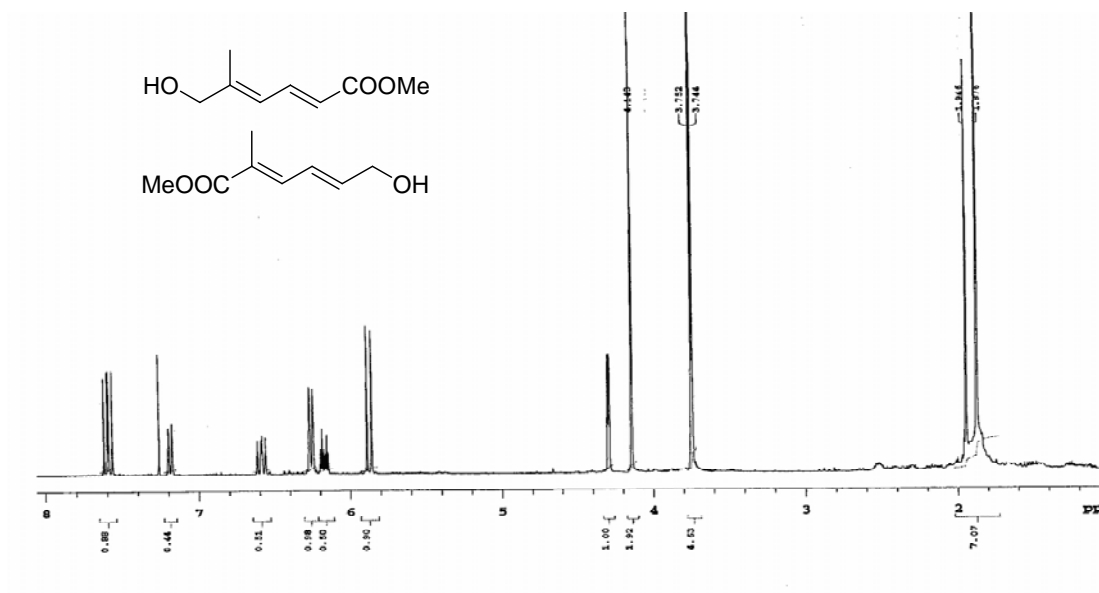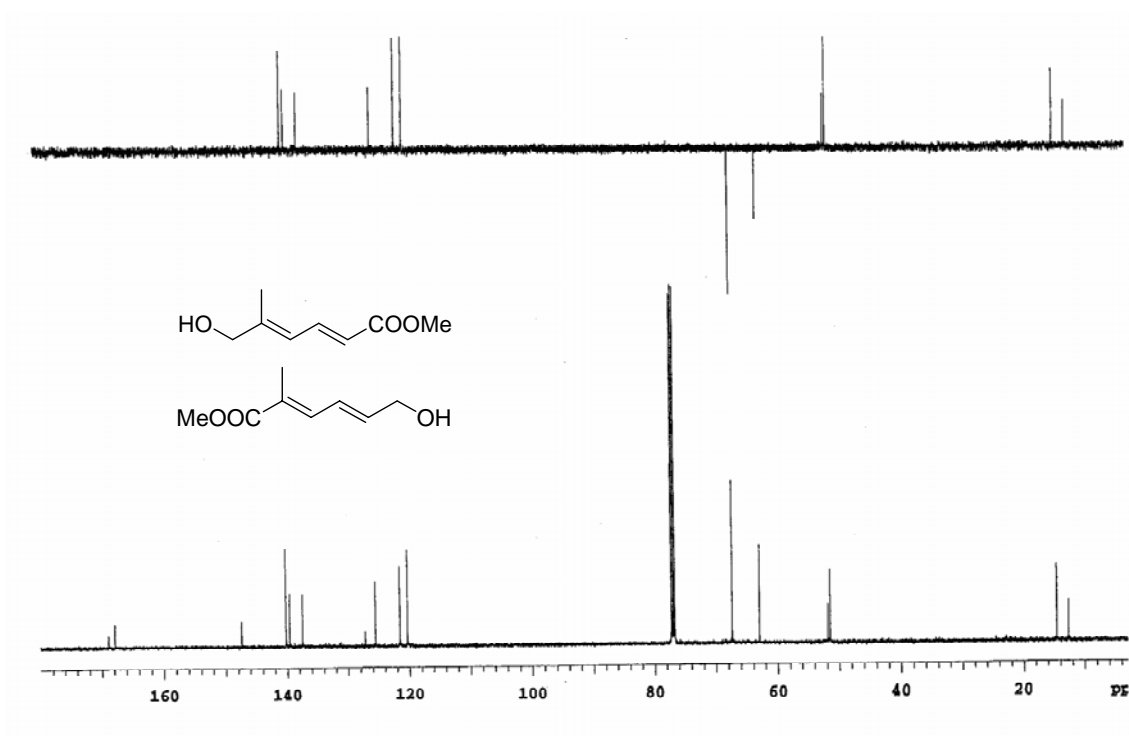

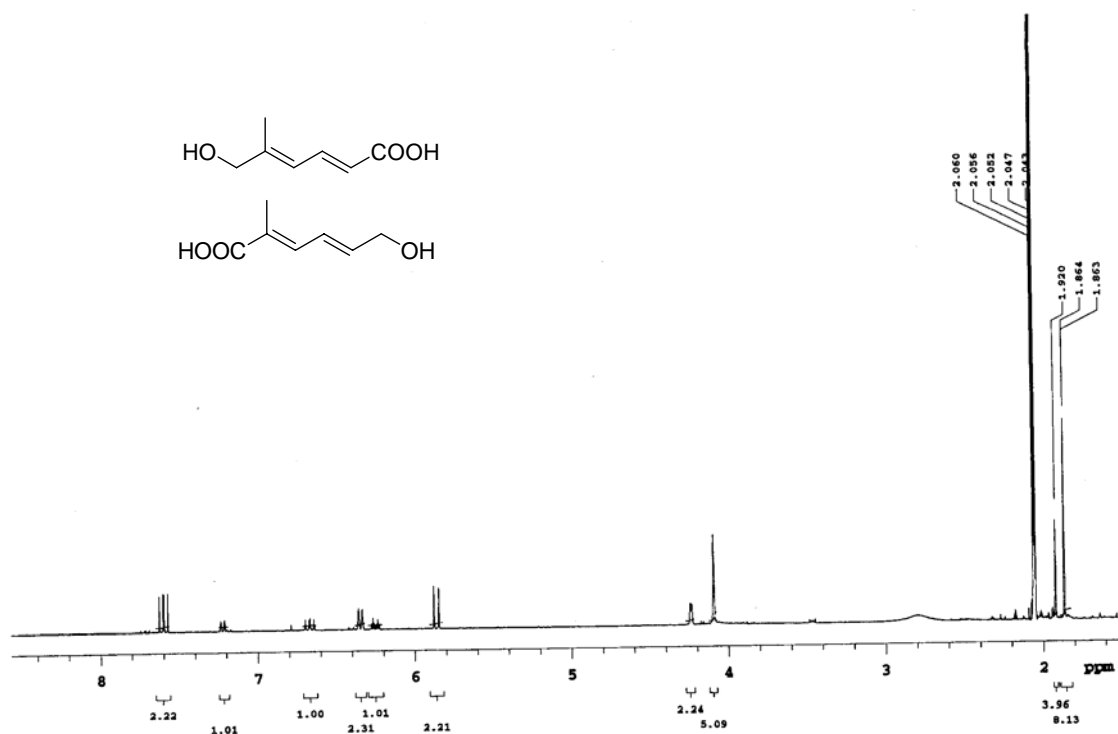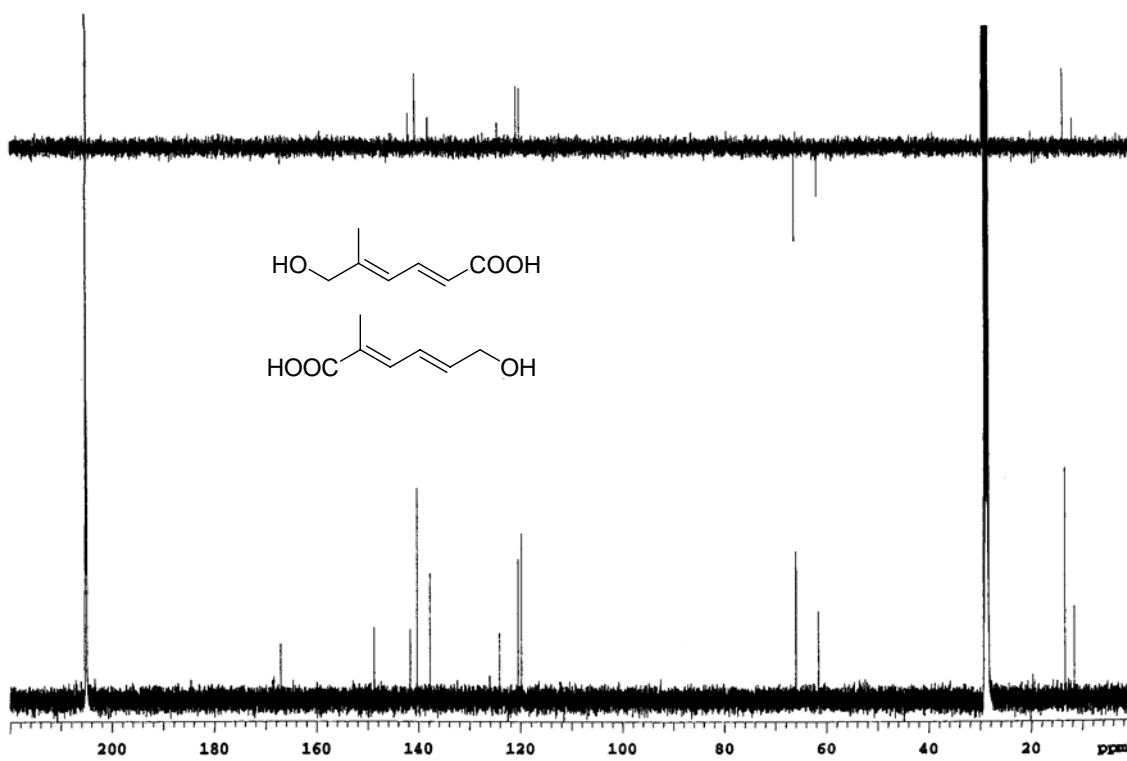

~  
R08-372-10  
File: KP  
Sample id: tmsstudy  
Pulse Sequence: s2pul

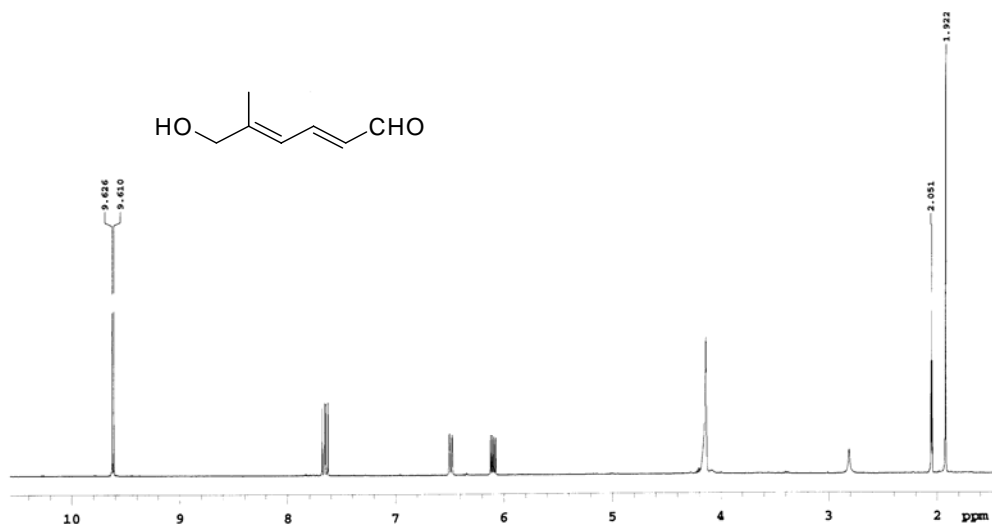

AL  
R08-372-10  
File: KP  
Sample id: tmsstudy  
Pulse Sequence: s2pul

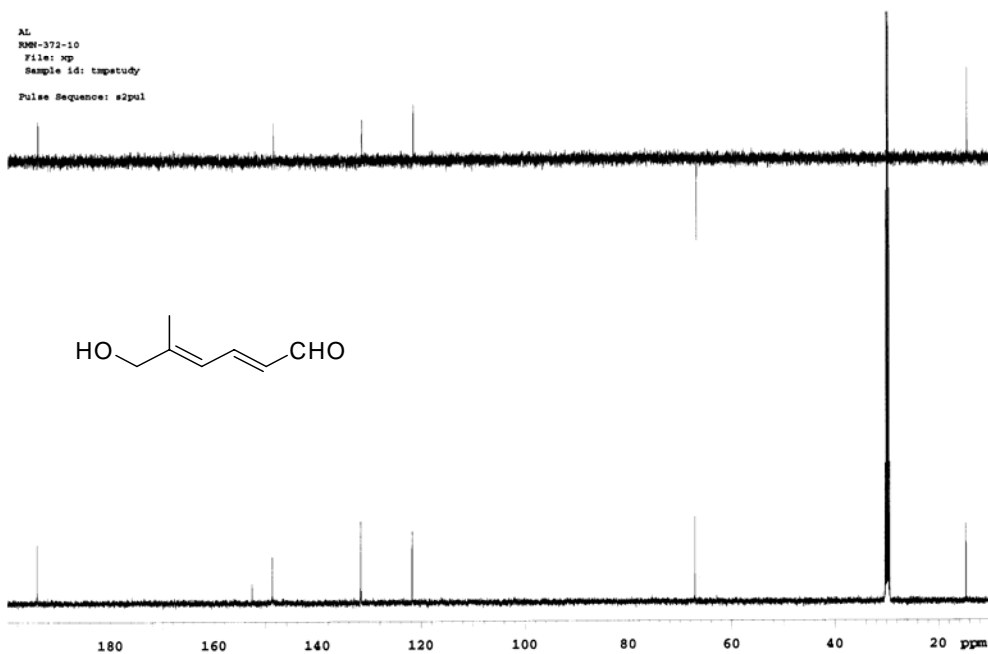

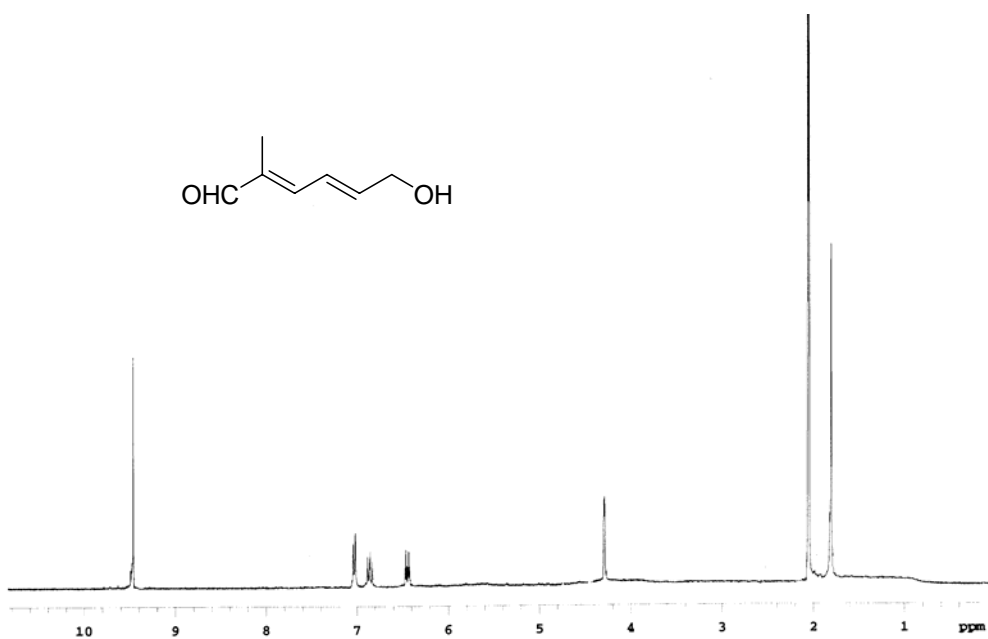

NAME  
208-373-10  
File: mp  
Sample id: mpstudy  
Pulse Sequence: s2pul

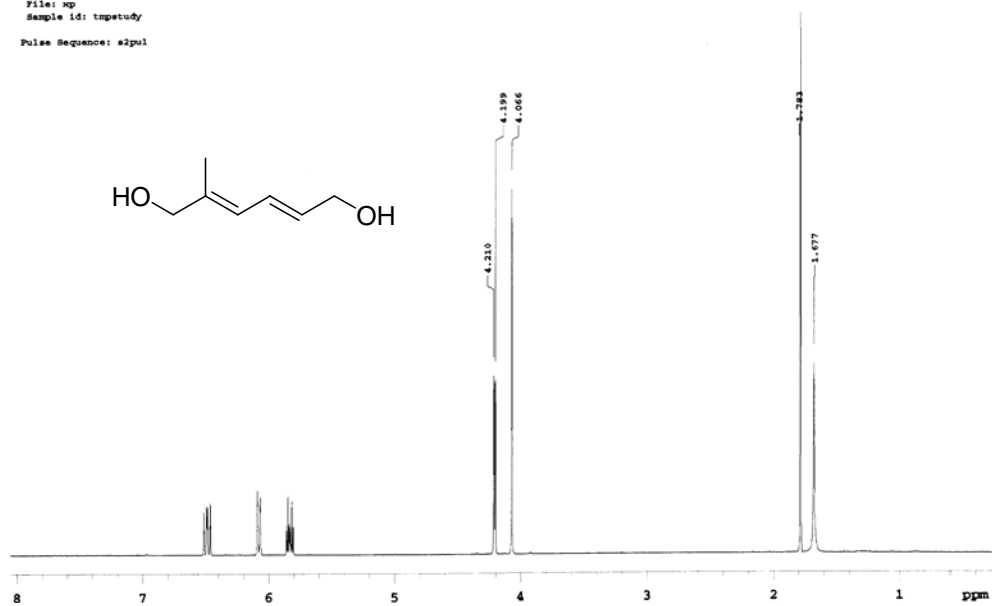

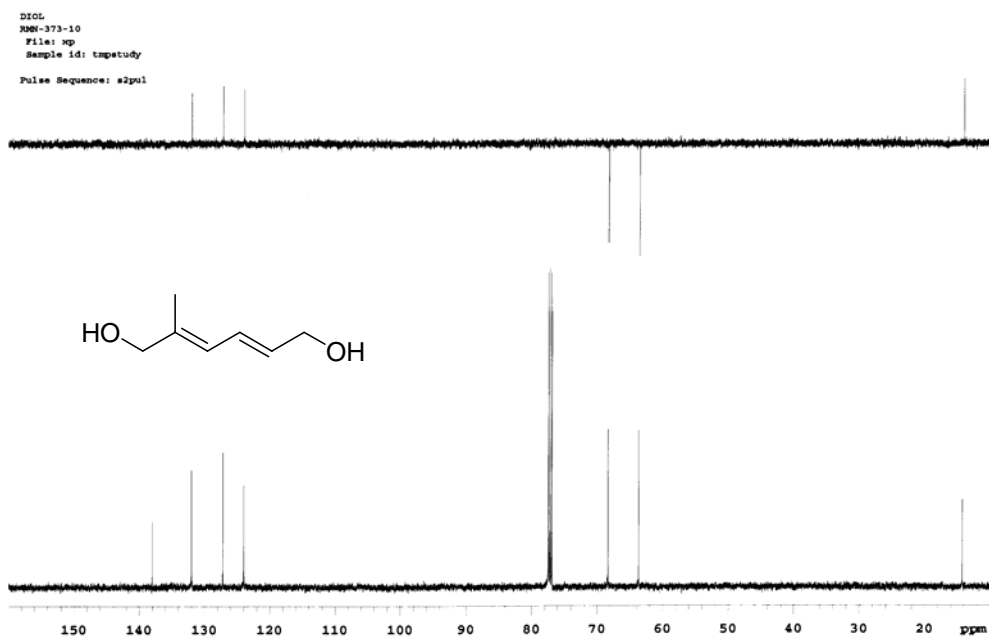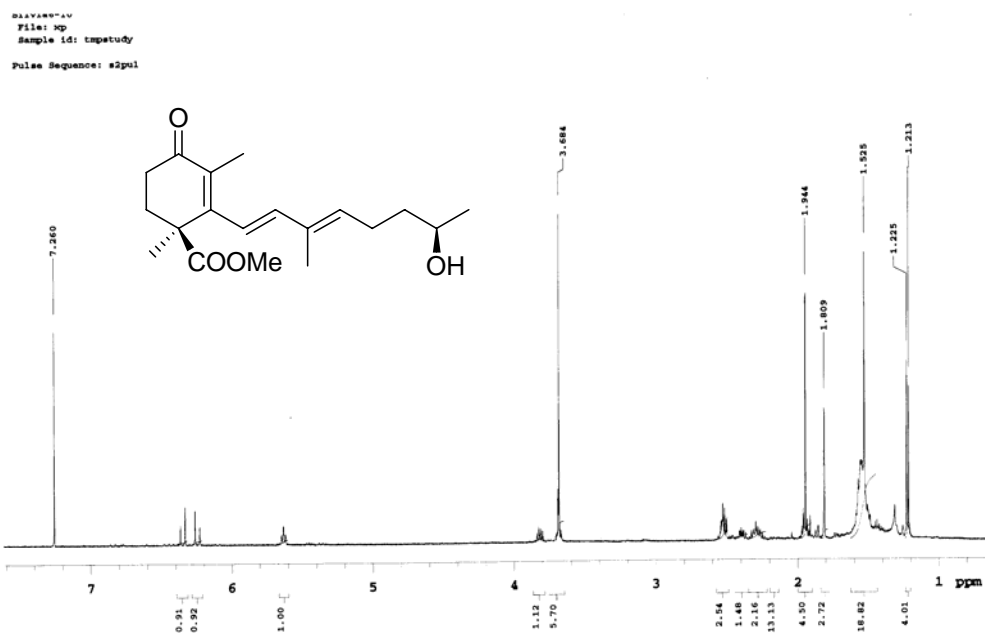

A-1  
NMN-343-09  
File: mp  
Sample id: tmpstudy  
Pulse Sequence: s2pul

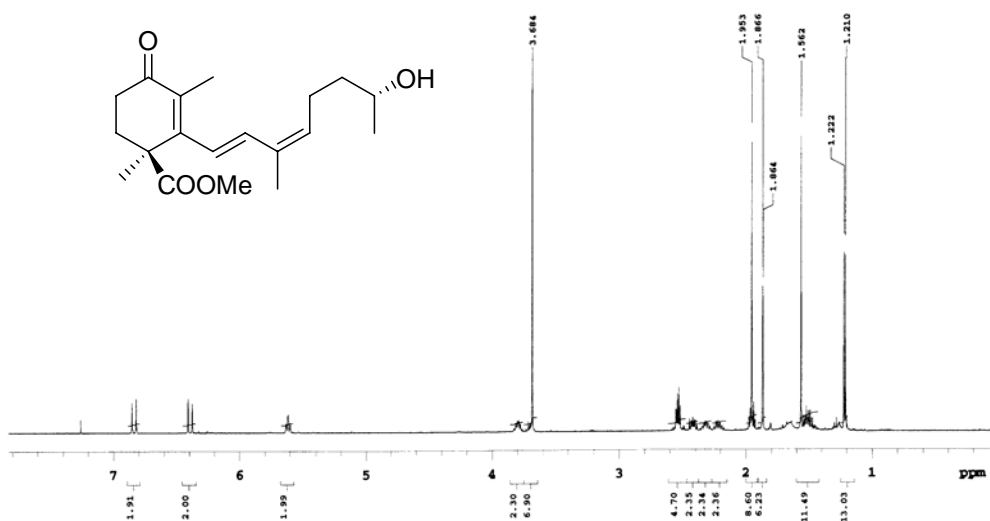

A-1  
NMN-343-09  
File: mp  
Sample id: tmpstudy  
Pulse Sequence: s2pul

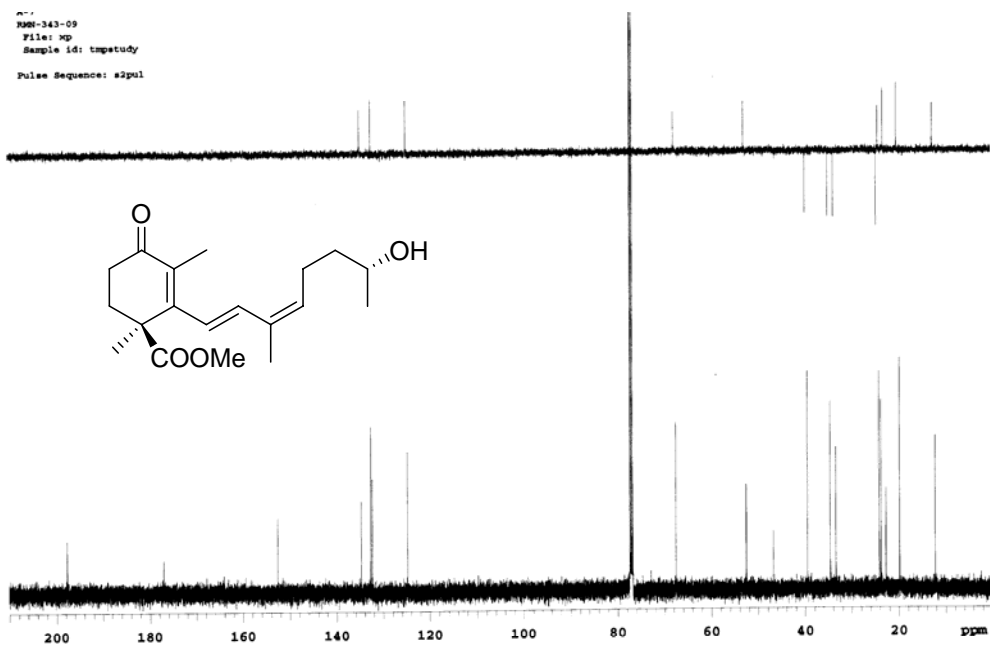

RMN-244-09  
File: xp  
Sample id: tmpstudy  
Pulse Sequence: s2pul

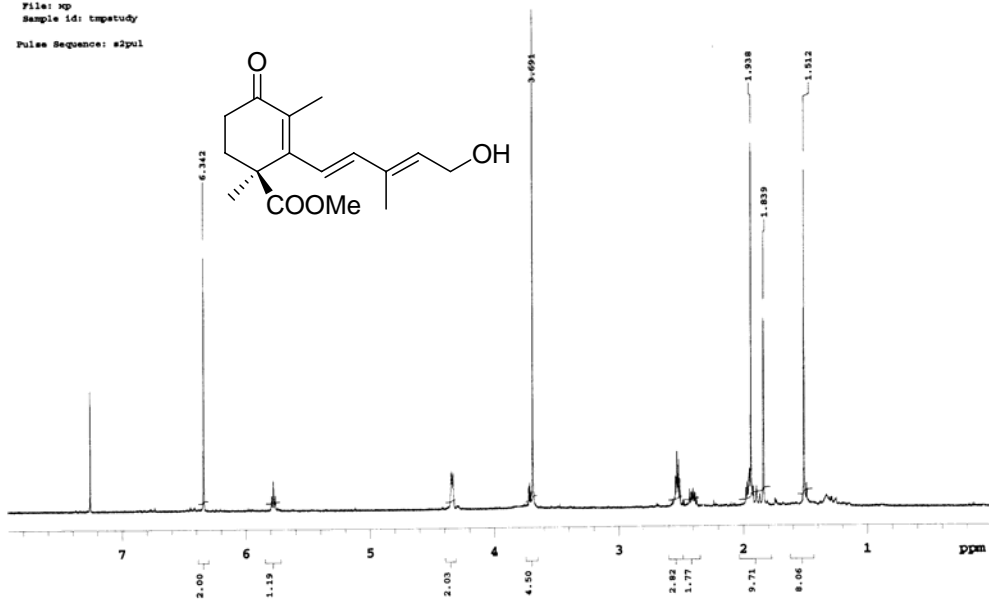

RMN-583-10  
File: xp  
Sample id: tmpstudy  
Pulse Sequence: s2pul

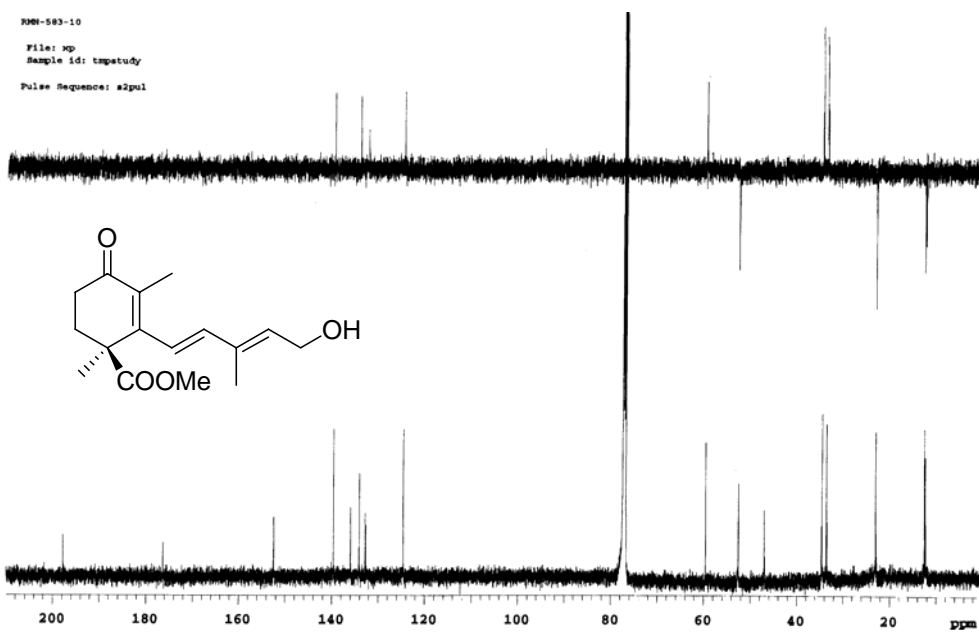



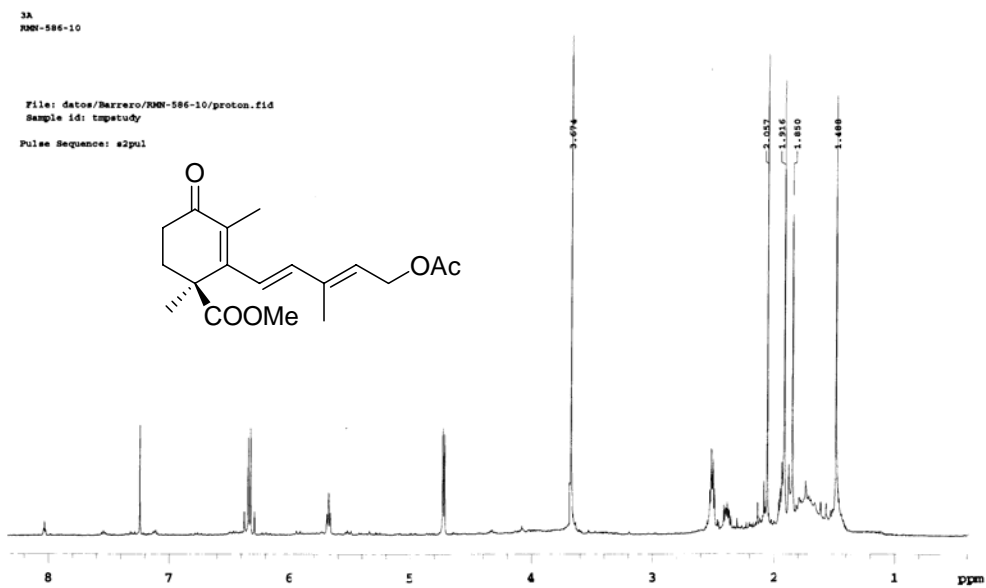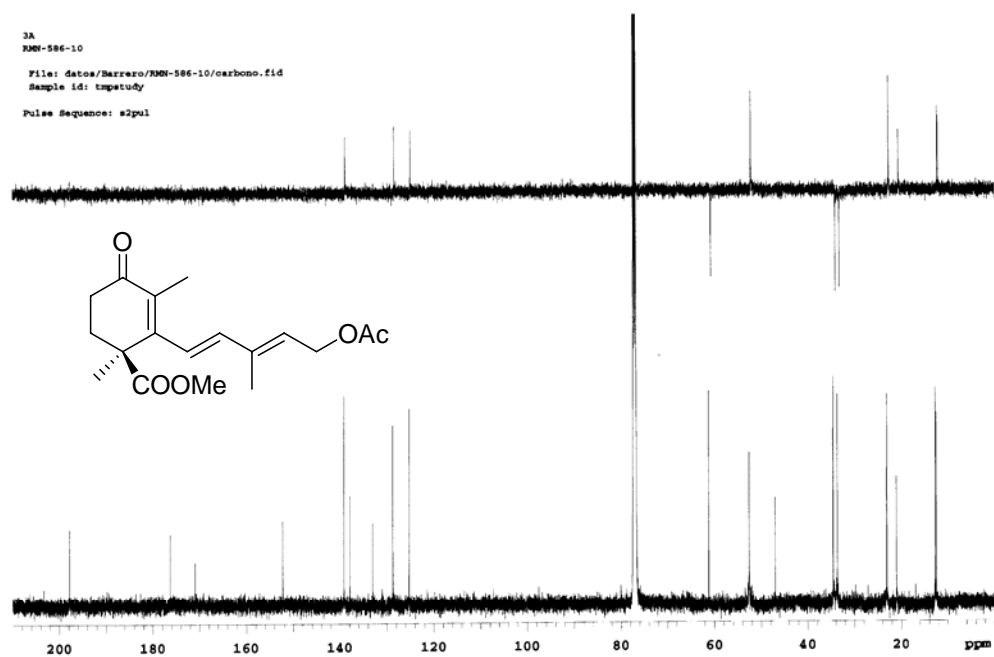

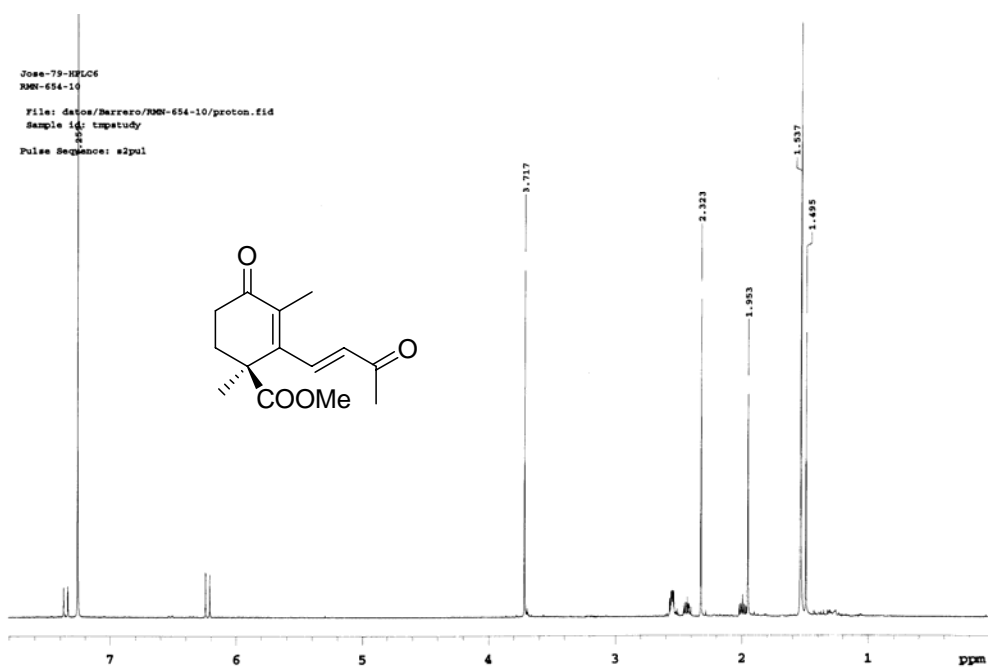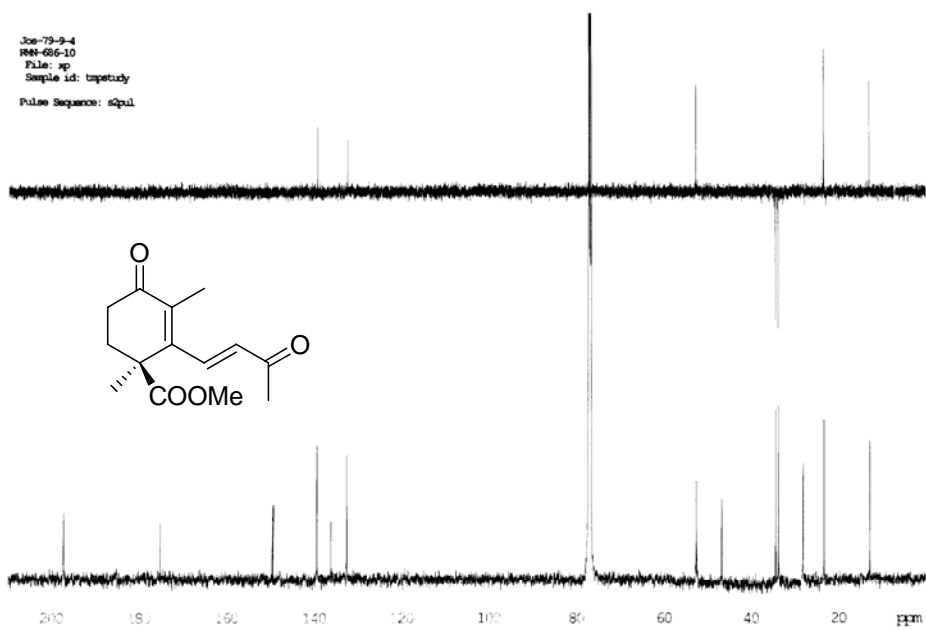

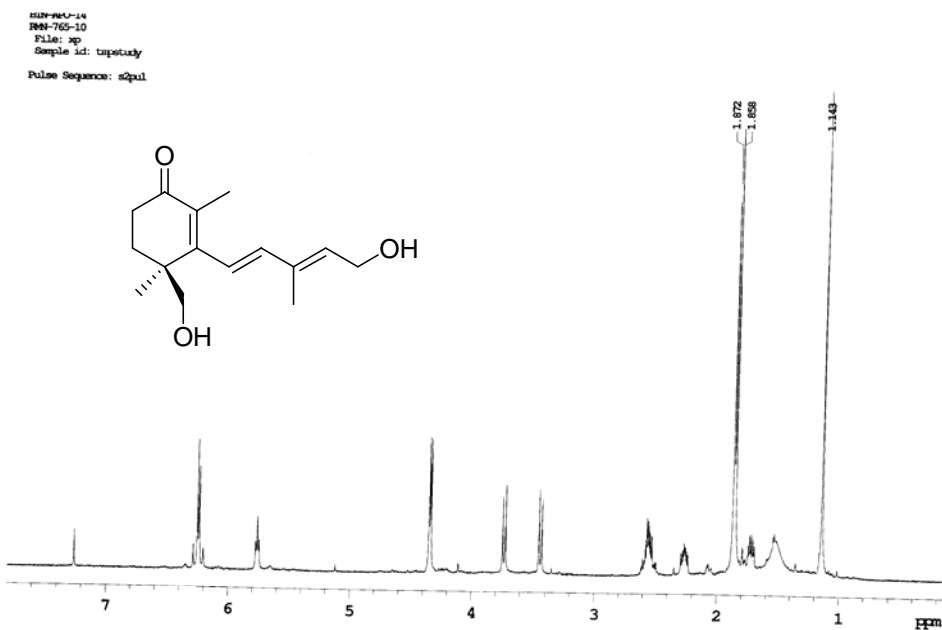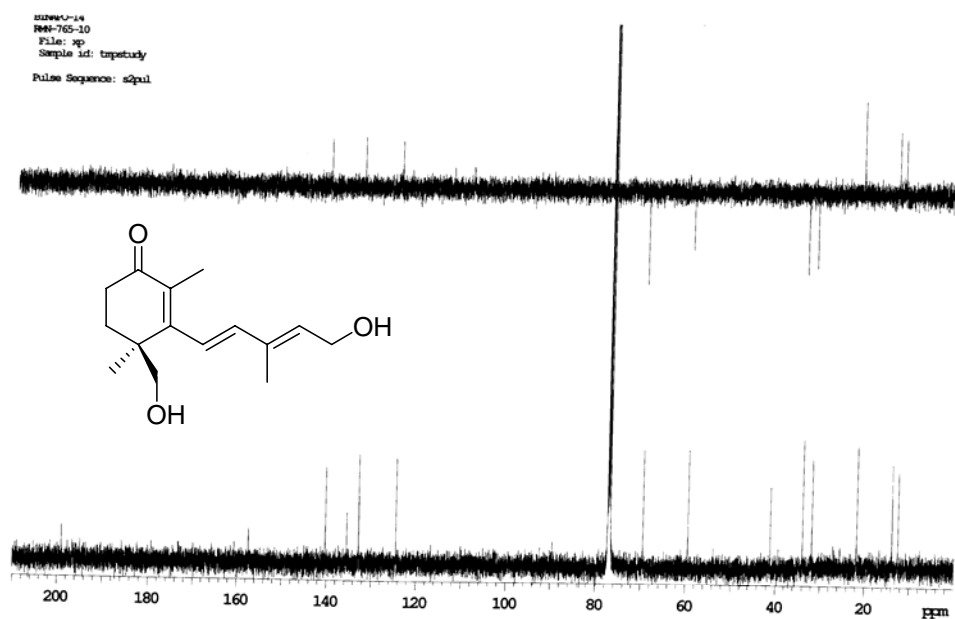

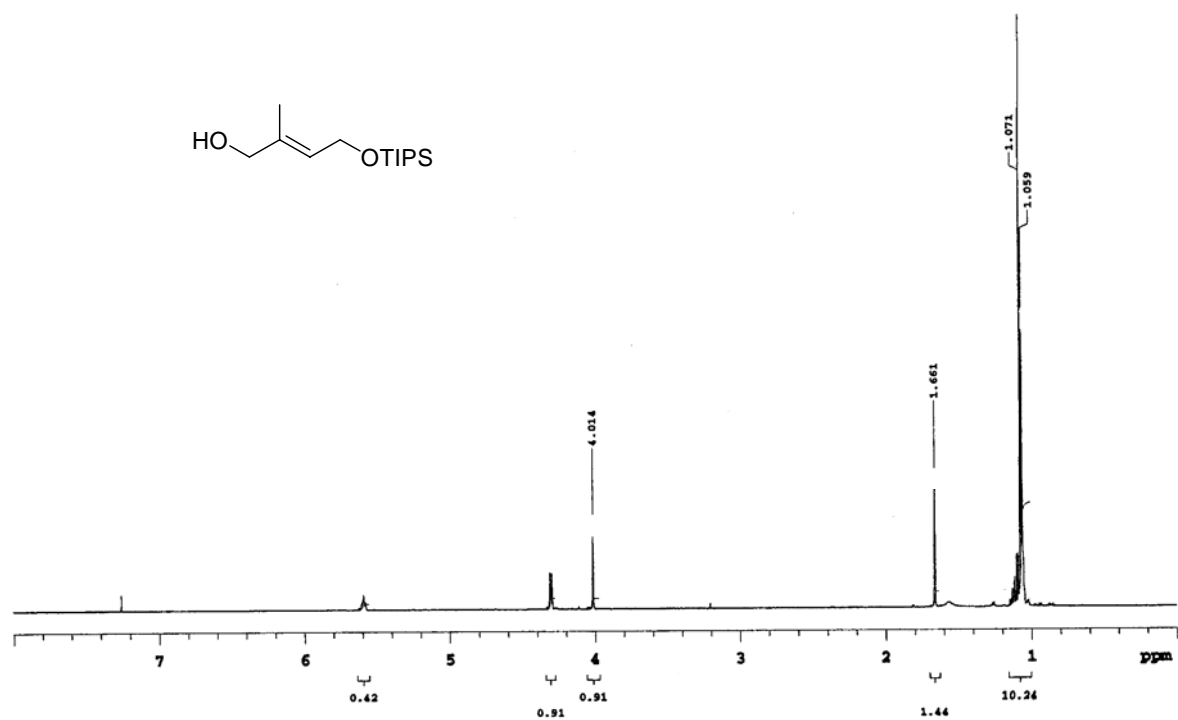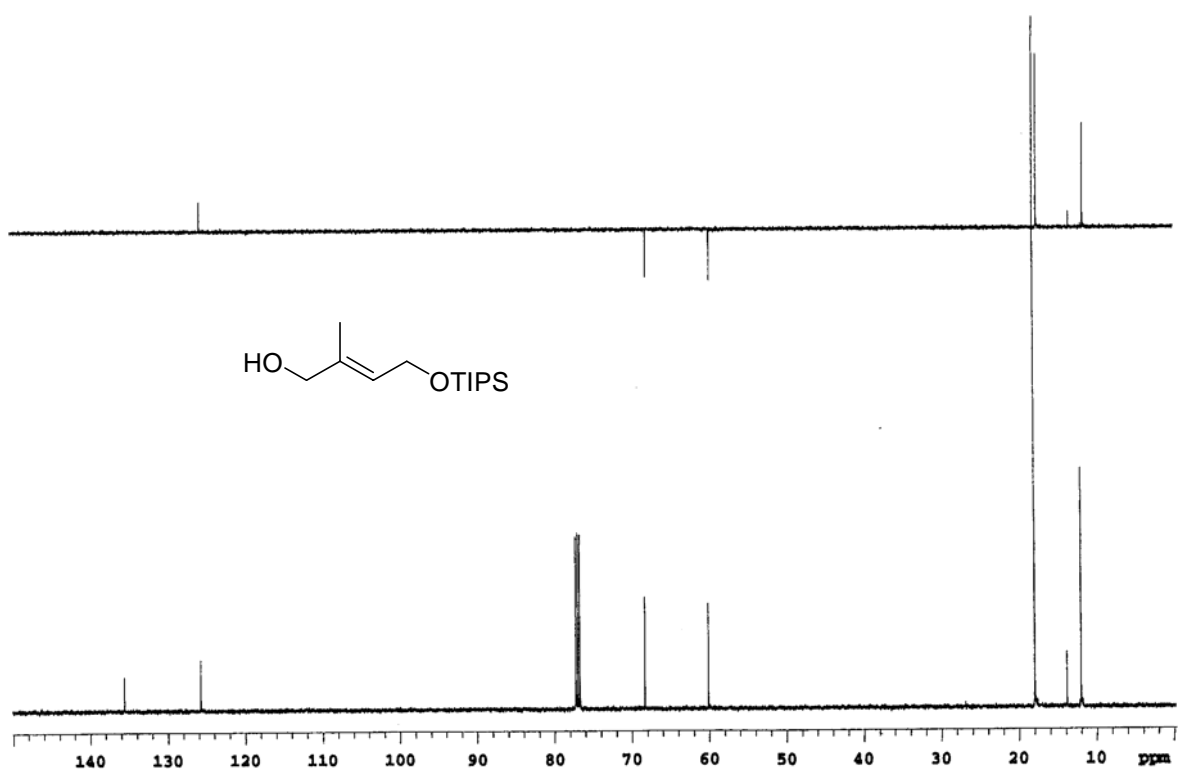

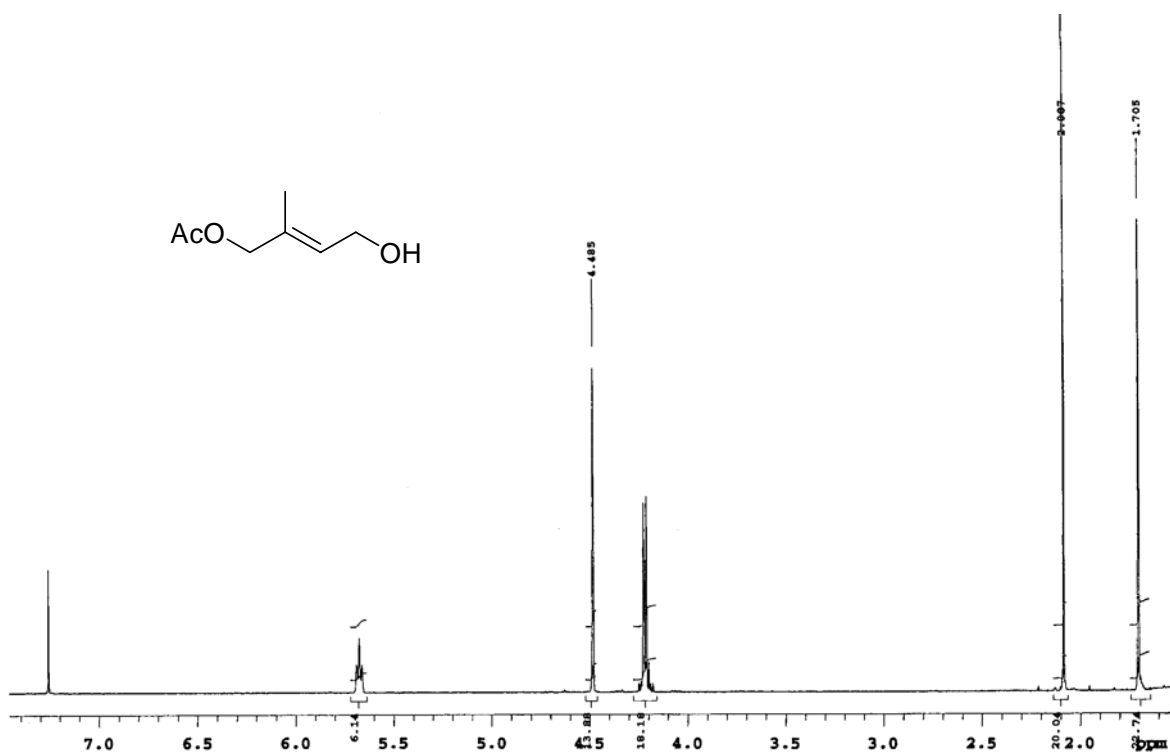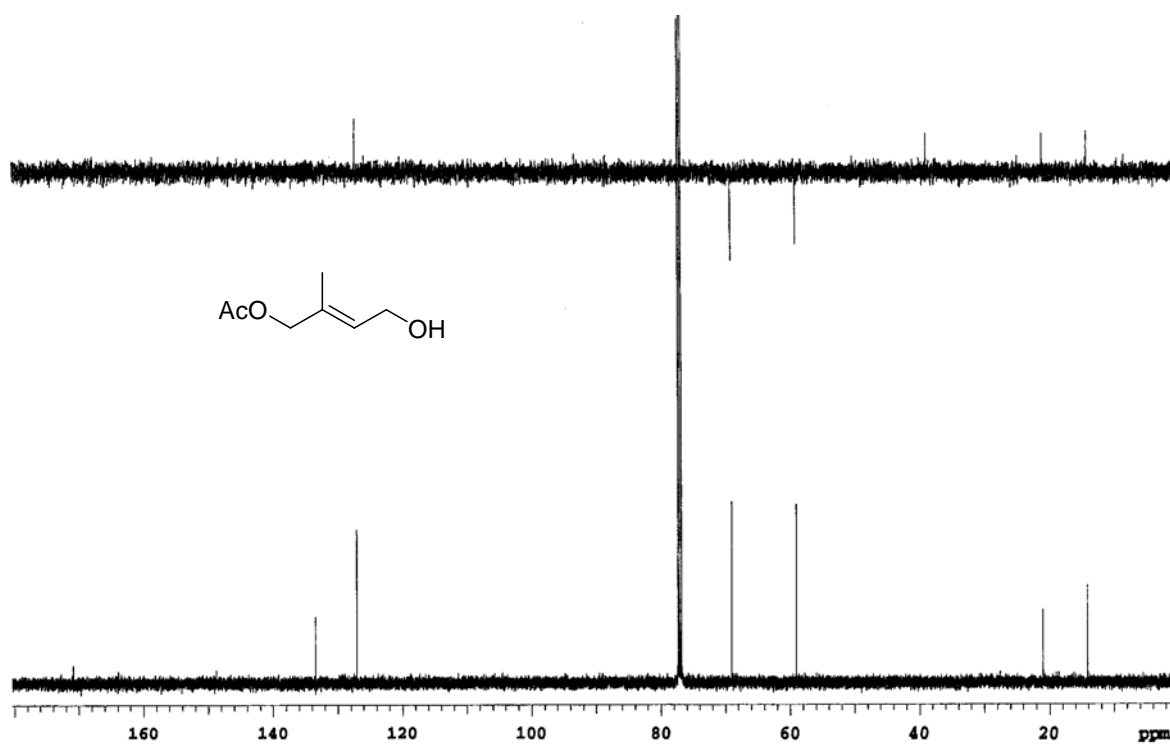

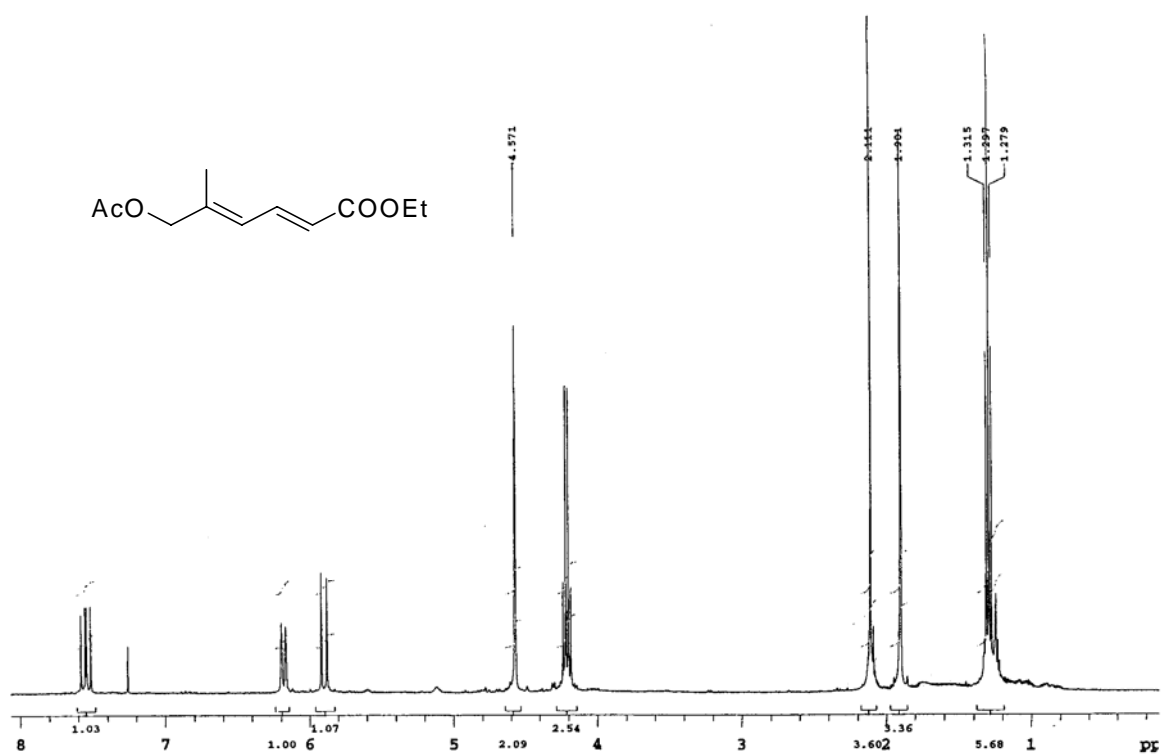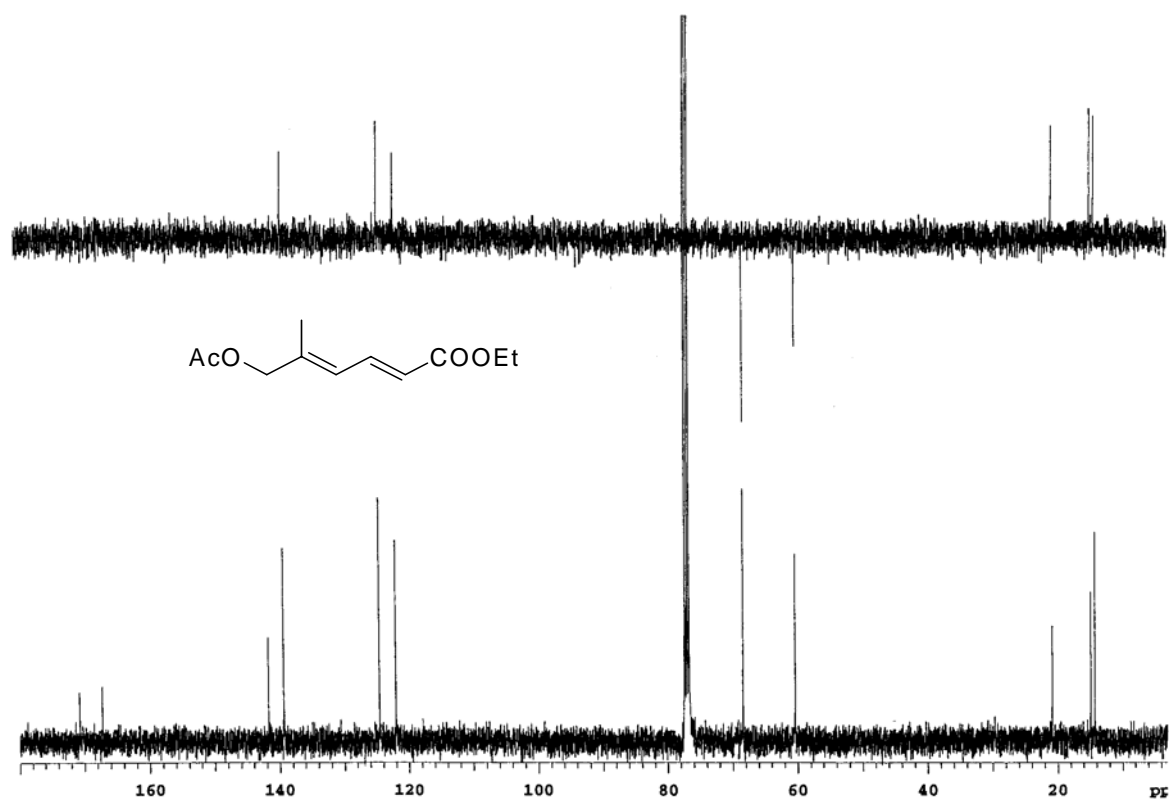

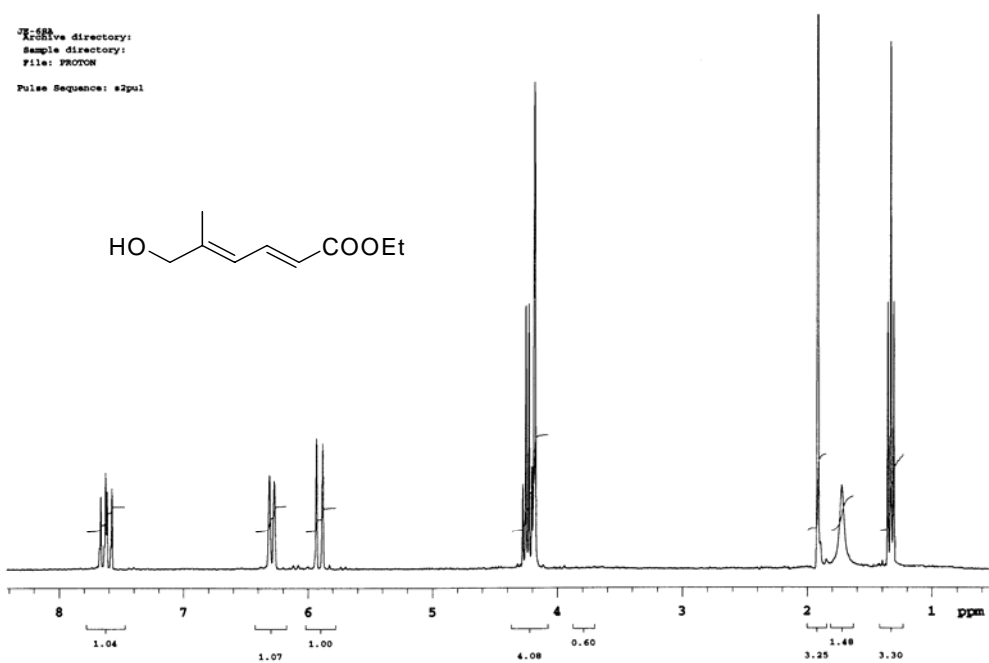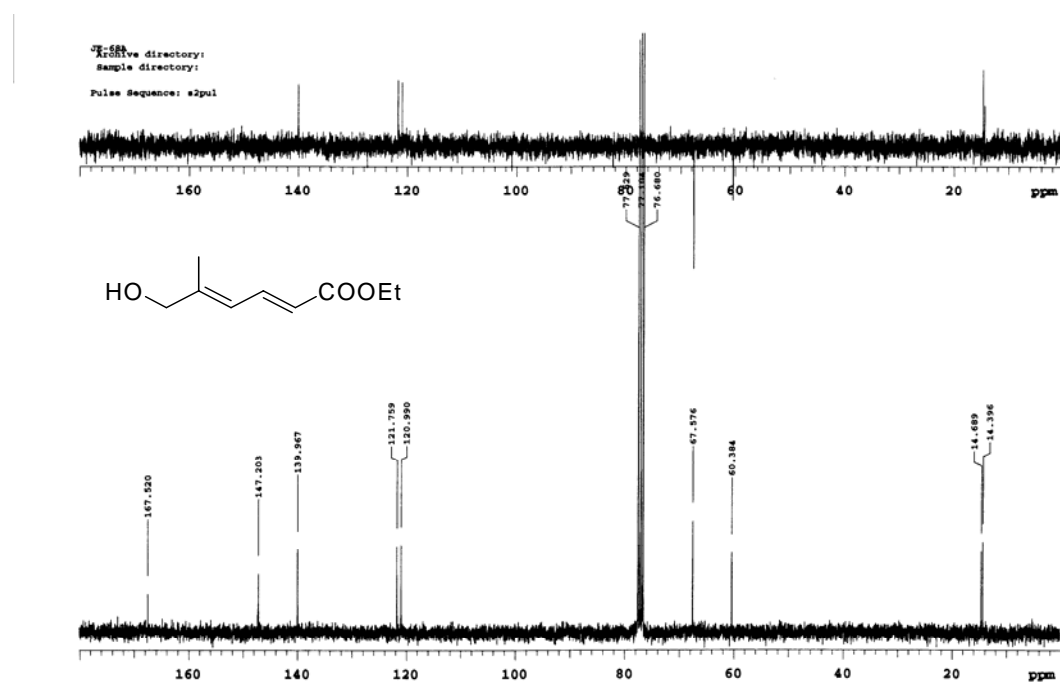

RMN-346-10  
File: datos/Barrero/RMN-346-10/proton.fid  
Sample id: tmpstudy  
Pulse Sequence: s2pul

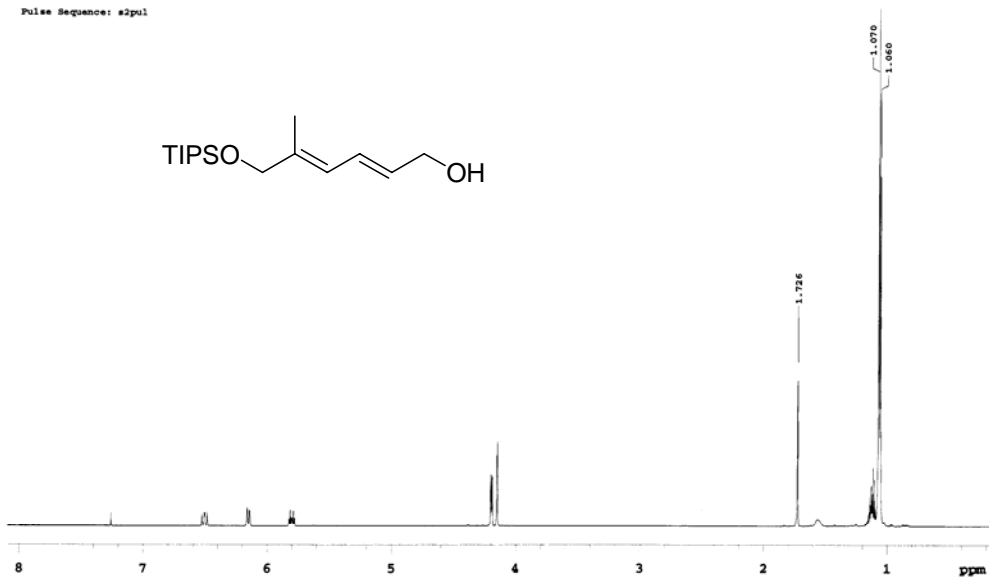

RMN-346-10  
File: datos/Barrero/RMN-346-10/carbono.fid  
Sample id: tmpstudy  
Pulse Sequence: s2pul

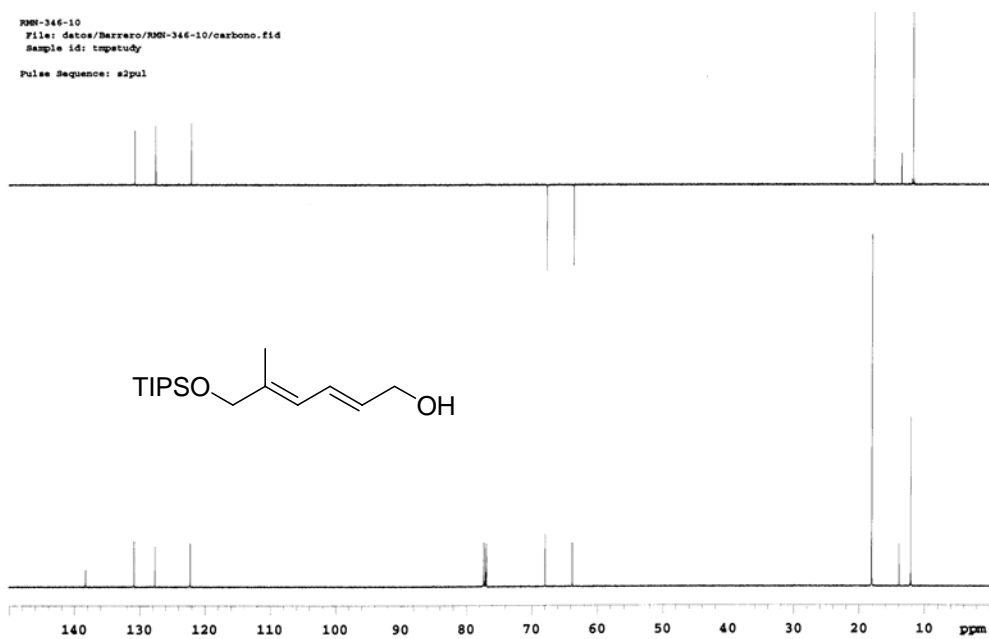



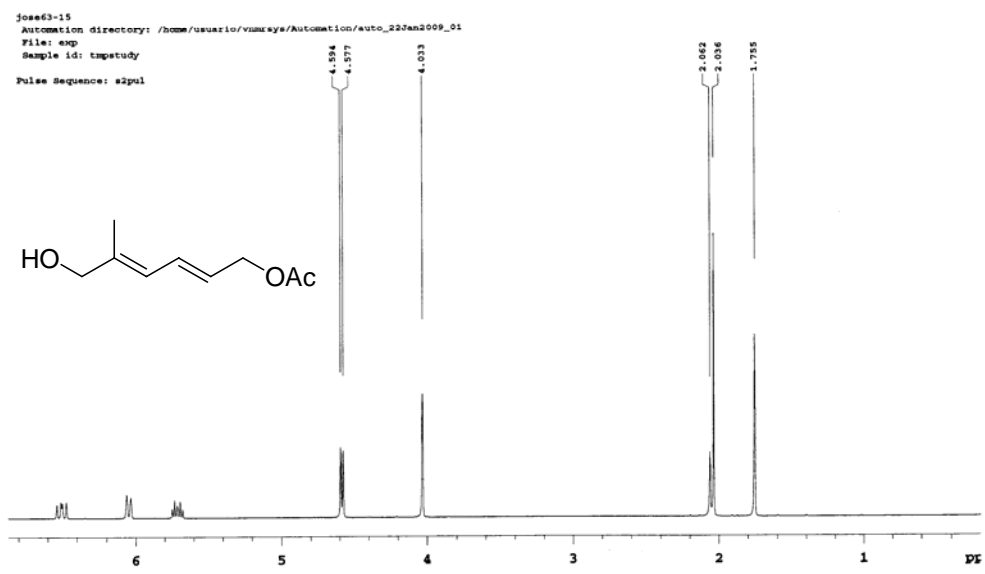

Jose 63.15  
Automation directory: /home/usuario/vnmrwa/Automation/auto\_22Jan2009\_01  
File: exp  
Sample id: tmpstudy  
Pulse sequence: DEPT

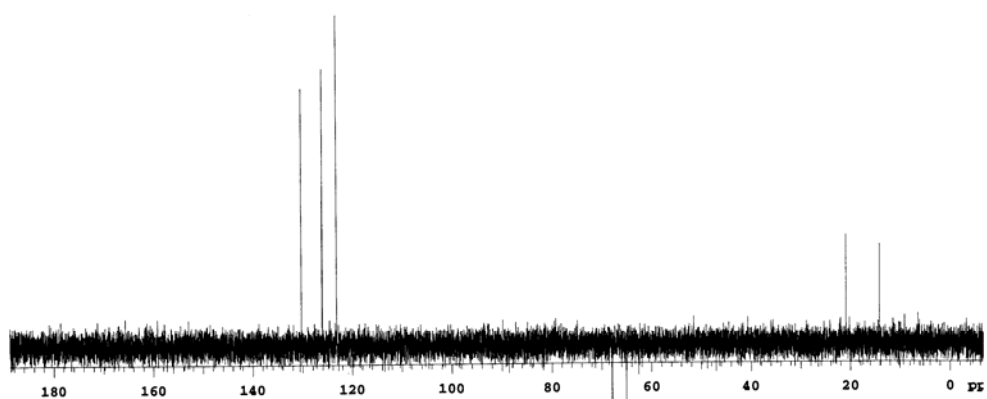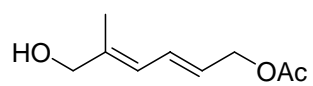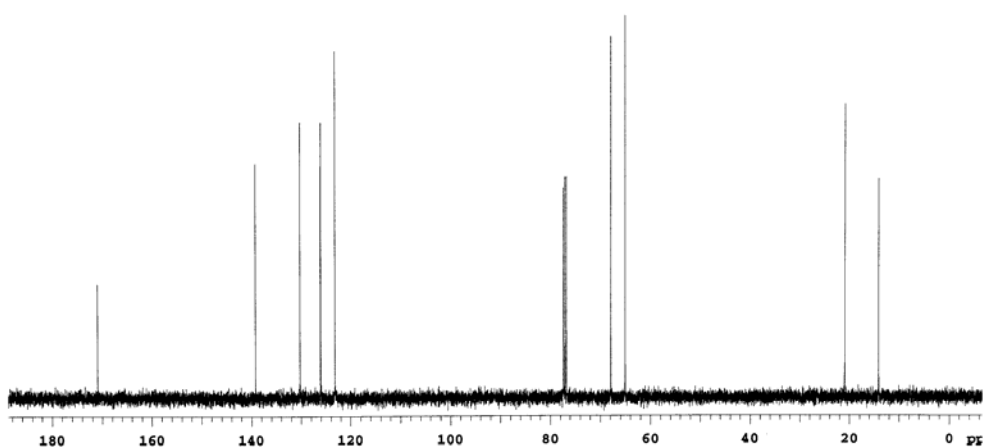

Supplement: c1ob05712j.pdf [file c1ob05712j.pdf]
